# Supplementary material
Source: HighWire-hosted journal article supplement (https://jme.bmj.com/highwire/filestream/144701/field_highwire_adjunct_files/0/medethics-2014-102596supp_appendix.pdf)
Supplement: medethics-2014-102596supp_appendix.pdf [file medethics-2014-102596supp_appendix.pdf]

## Appendix

### **Fourteen Web-based CME modules on Hypoactive Sexual Desire Disorder in Women**

\*Wysocki Susan, \*Kellogg-Spadt Susan, \*Kingsberg Sheryl A, \*Krychman Michael L. Talking to Female Patients about Sexual Health: Overcoming Common Communication Challenges. \* Medscape. Released: May 25, 2010. Expires May 25, 2011. Accessed August 17, 2013.

Available from: <http://cme.medscape.com/viewarticle/721398>.

\*Bachmann Gloria A, \*Kellogg-Spadt Susan. Communication Strategies in Assessing Sexual Health: The Short Interview-Uncovering the need for a Long interview. Medscape and the University of Medicine & Dentistry of New Jersey. Released Feb 3, 2010. Expires Feb 3, 2011. Available from: <http://cme.medscape.com/viewarticle/713409>. Accessed July 8, 2011.

Bailey Laurie A, \*Krychman Michael L. Communication Strategies in Assessing Sexual Health: Uncovering an Underlying Condition. Medscape and the University of Medicine & Dentistry of New Jersey) Released Feb 11, 2010. Expires Feb 11, 2011. Available from: <http://cme.medscape.com/viewarticle/712564>. Accessed August 17, 2013.

\*Kingsberg Sheryl A, \*Kellogg-Spadt Susan. The Essentials of Assessing the Sexual Concerns of Your Female Patients. Medscape and the University of Medicine & Dentistry of New Jersey. Released Feb 2, 2010. Expires Feb 2, 2011. Available from: <http://cme.medscape.com/viewarticle/710343>. Accessed July 8, 2011.

Green Marjorie A, Martinez Lisa A. Female Sexual Dysfunction: Recognizing the Impact on Patient and Partner. Medscape. Released May 21, 2010. Available from: <http://cme.medscape.com/viewarticle/721520>. Accessed August 17, 2013.

Pillai-Friedman, Sabitha. Barriers to Communication About Female Sexual Health: Tips for Successful Dialogue with Patients. Medscape. Released May 21, 2010. Available from: <http://cme.medscape.com/viewarticle/721521>. Accessed August 2013.

\*Kingsberg Sheryl A (author). \*Bachmann Gloria A. (peer-reviewer). Diagnosis and Classification of Female Sexual Dysfunction. Baylor College of Medicine. Released Aug 2008. Expires Aug 2010. Available from: [http://www.baylorcme.org/cme/fsd/slides/talk\\_cme.cfm?CME\\_activityid=234&talk\\_pk=48&tk=48&shownotes=1&cmepage=cme\\_info](http://www.baylorcme.org/cme/fsd/slides/talk_cme.cfm?CME_activityid=234&talk_pk=48&tk=48&shownotes=1&cmepage=cme_info). Accessed July 8, 2011.

\*Kingsberg Sheryl A. Vaginismus and Hypoactive Sexual Desire Disorder in a Young Woman. (Baylor College of Medicine) Released May 2009. Expired May 2010. Available from: <http://www.baylorcme.org/cme/fsd/clinical-cases/vaginismus/>. Accessed April 22, 2012. (not currently available).

\* Kingsberg, Sheryl A, \*Simon James A. Hypoactive Sexual Desire Disorder in Women, Implications for Family Practice. Supplement to the Journal of Family Practice. 2009 July; 58(7). Released July 15, 2009. Expires July 15, 2010. (DIME) Available from: [http://www.jfponline.com/Pages.asp?id=7743&issue=July\\_2009&UID](http://www.jfponline.com/Pages.asp?id=7743&issue=July_2009&UID). Accessed April 22, 2012.

Cox, Raymond, \*Moore Laura Fye. Empowering PAs to ask their female patients about sexual health. Journal of the American Academy of Physician Assistants. 2010 June; 23(6). (AAPA) Available from: <http://www.jaapa.com/empowering-pas-to-ask-female-patients-about-their-sexual-health/article/171462/>. Accessed April 22, 2012.

\*Kingsberg Sheryl A, \*Altman Alan M, \*Parish Sharon J. Assessment and Treatment of Hypoactive Sexual Desire Disorder. Sexuality, Reproduction and Menopause. 2010 Feb. 8(1). Online version released Feb 1, 2010. Expires Feb 1, 2011. (American Society for Reproductive Medicine). Available from: <http://www.srm-ejournal.com/article.asp?AID=8352>. Accessed April 22, 2012. no longer available.

\*Clayton Anita H, Brotto Lori, \*Kingsberg Sheryl A, Frank Jennifer E. The Science and Medicine of Hypoactive Sexual Desire Disorder (HSDD). The University of Massachusetts Medical School, Pharmatecture LLC, CMEducation Resources LLC. Released May 18 2010. Expires May 18, 2012. Available from: <http://www.clinicalwebcasts.com/cvr/117.htm>. Accessed August 17, 2013.

\*Levine Stephen B. Hypoactive Sexual Desire Disorder in Women. Presentation at 22nd Annual U.S. Psychiatric and Mental Health Congress Conference and Exhibition 2009. (CME LLC) 2009 (November 4). Available from: [http://www.cmellc.com/psychcongress/syllabus/data/32-2-Levine-Female-HYPOACTIVE SEXUAL DESIRE DISORDER\\_Input-WDL-BW.pdf](http://www.cmellc.com/psychcongress/syllabus/data/32-2-Levine-Female-HYPOACTIVE%20SEXUAL%20DESIRE%20DISORDER_Input-WDL-BW.pdf). Accessed April 22, 2012. no longer available.

\*Wysocki, Susan. Women's Sexual Health, Addressing Low Libido. Released May 3, 2010. Expires May 3, 2012. Cmecorner.com. Available from: <http://www.cmecorner.com/programs.asp?audience=&ProductID=794>. Accessed August 17, 2013.

\* Authors who reported receiving grants or fees from Boehringer Ingelheim Pharmaceuticals Inc. for speaking, consulting, research or advisory board services.
